# Supplementary material for: Evolution of Interferon-Gamma Aptamer with Good Affinity and Analytical Utility by a Rational In Silico Base Mutagenesis Post-SELEX Strategy
Source: MDPI journal article supplement (doi:10.3390/molecules27175725), 2022-09-05
Supplement: s1 [file s1]

## **Supplementary Materials**

# **Evolution of Interferon-Gamma Aptamer with Good Affinity and Analytical Utility by a Rational In Silico Base Mutagenesis Post-SELEX Strategy**

**Lianhui Zhao <sup>1</sup>, Qionglin Wang <sup>2</sup>, Yingai Yin <sup>1</sup>, Yan Yang <sup>1</sup>, Huifang Cui <sup>3</sup> and Yiyang Dong <sup>1,\*</sup>**

<sup>1</sup> College of Life Science and Technology, Beijing University of Chemical Technology, Beijing 100029, China

<sup>2</sup> Henan Key Laboratory of Children's Genetics and Metabolic Diseases, Children's Hospital Affiliated to Zhengzhou University, Zhengzhou 450018, China

<sup>3</sup> College of Life Sciences, Zhengzhou University, Zhengzhou 450001, China

\* Correspondence: yydong@mail.buct.edu.cn; Tel.: +86-010-64446260

**Table S1.** List of oligonucleotides.

| DNA sequences | Sequence(5'→3')                                                 |
|---------------|-----------------------------------------------------------------|
| M5-5          | CCGCCCAAATCCCGAAGGGAAGAGTGTAATGACGTCAAACCAGA<br>CACATTACACACGCA |
| MB-10         | FAM-CGCGC <u>GTGTAATGTGG</u> CGCG-BHQ1                          |
| MB-15         | FAM-CGCGC <u>GTGTAATGTGTCTGGG</u> CGCG-BHQ1                     |
| MB-20         | FAM-CGCGC <u>GTGTAATGTGTCTGGTTTGAG</u> CGCG-BHQ1                |
| MB-25         | FAM-CGCGC <u>GTGTAATGTGTCTGGTTTGACGTCAG</u> CGCG-BHQ1           |

The underlined letters represent the complementary sequences.

**Table S2.** B1-4 and mutants with low free energy in the first round library.

| Name  | Sequence(5'→3')                                                 | Dot-bracket information          | $\Delta G$ (kcal/mol) | ZDOCK score |
|-------|-----------------------------------------------------------------|----------------------------------|-----------------------|-------------|
| B 1-4 | CCGCCCAAATCCCTAAGAGAAGACTGTAATGAC<br>ATCAAACCAGACACACTACACACGCA | .....((((.....))).               | -1.03                 | 1246.537    |
| M1-1  | CCGCCCAAATCCCTAAGAGAAGACTGTAGTGAC<br>ATCAAACCAGACACACTACACACGCA | .....((((((.....)))))).          | -4.76                 | 1253.540    |
| M1-2  | CCGCCCAAATCCCTAAGAGAAGACTGGAATGAC<br>ATCAAACCAGACACACTACACACGCA | .....((((..(.....)..))).         | -4.38                 | 1389.447    |
| M1-3  | CCGCCCAAATCCCTAAGAGAAGACTGTAATGAC<br>ATCAAACCAGACACATTACACACGCA | .....((((((.....)))))).          | -3.90                 | 1387.888    |
| M1-4  | CCGCCCAAATCCCTAAGCGAAGACTGTAATGAC<br>ATCAAACCAGACACACTACACACGCA | ..((((.....)))....((((.....))).  | -3.61                 | 1307.033    |
| M1-5  | CCGCCCAAATCCCTAAGAGAAGTCTGTAATGACA<br>TCAAACCAGACACACTACACACGCA | .....((((((.....))))).           | -3.49                 | 1438.918    |
| M1-6  | CCGCCCAAATCCCTAAGAGAAGACTGTAATGAC<br>ATCAAACCAGTCACACTACACACGCA | .....((((((.....))))).           | -3.49                 | 1264.011    |
| M1-7  | CCGCCCAAATCCCTAAGAGAAGACTGTAATGAC<br>ATCAAAACAGACACACTACACACGCA | .....((((..(.....)..))).         | -3.46                 | 1362.160    |
| M1-8  | CCGCCCAAATCCCTAAGGGAAGACTGTAATGAC<br>ATCAAACCAGACACACTACACACGCA | ...((((.....)))....((((.....))). | -3.38                 | 1447.860    |

|       |                                                                 |                                      |       |          |
|-------|-----------------------------------------------------------------|--------------------------------------|-------|----------|
| M1-9  | CCGCCCAACTCCCTAAGAGAAGACTGTAATGAC<br>ATCAAACCAGACACACTACACACGCA | .....(((.....)))....(((.....)))..... | -3.34 | 1410.515 |
| M1-10 | CCGCCCAAATCCCTAAGAGAAGACTGTATTGACA<br>TCAAACCAGACACACTACACACGCA | .....(((.....))).....                | -3.18 | 1288.798 |

The matched brackets represent base pairs, and dots represent unpaired bases.

**Table S3.** Mutants with low free energy in the second round library.

| Name | Sequence(5'→3')                                                 | Dot-bracket information               | $\Delta G$ (kcal/mol) | ZDOCK score |
|------|-----------------------------------------------------------------|---------------------------------------|-----------------------|-------------|
| M2-1 | CCGCCCAAATCCCTAAGGGAAGACTGTAGTGA<br>CATCAAACCAGACACACTACACACGCA | ...(((.....))).....((((.....))))..... | -7.11                 | 1261.302    |
| M2-2 | CCGCCCAAATCCCTAAGAGAAGACTGGAATGA<br>CATCAAACCAGTCACACTACACACGCA | .....((((.....))).....                | -6.84                 | 1311.845    |
| M2-3 | CCGCCCAAATCCCTAAGAGAAGTCTGGAATGA<br>CATCAAACCAGACACACTACACACGCA | .....((((.....))).....                | -6.84                 | 1297.627    |
| M2-4 | CCGCCCAAATCCCTAAGGGAAGACTGGAATGA<br>CATCAAACCAGACACACTACACACGCA | ...(((.....)))....(((.....))).....    | -6.73                 | 1229.231    |
| M2-5 | CCGCCCAACTCCCTAAGAGAAGACTGGAATGA<br>CATCAAACCAGACACACTACACACGCA | .....(((.....)))....(((.....))).....  | -6.69                 | 1265.095    |
| M2-6 | CCGCCCAAATCCCTAAGGGAAGACTGTAATGA<br>CATCAAACCAGACACATTACACACGCA | ...(((.....))).....((((.....))))..... | -6.25                 | 1485.757    |

|       |                                                                 |                                             |       |          |
|-------|-----------------------------------------------------------------|---------------------------------------------|-------|----------|
| M2-7  | CCGCCCAAATCCCTAAGAGAAGACTGTAATGA<br>CATCAAACCAGACACATTACACACGCA | .....(((.....))).....((((((.....))))))..... | -6.21 | 1309.004 |
| M2-8  | CCGCCCAAATCCCTAAGCGAAGTCTGTAATGAC<br>ATCAAACCAGACACACTACACACGCA | .(((.....)))..((((.....)))).....            | -6.07 | 1311.561 |
| M2-9  | CCGCCCAAATCCCTAAGAGAAGACTGGATTGA<br>CATCAAACCAGACACACTACACACGCA | .....((((.....)))).....                     | -5.98 | 1310.280 |
| M2-10 | CCGCCCAAATCCCTAAGAGAAGTCTGTAATGAC<br>ATCAAAACAGACACACTACACACGCA | .....((((.....)))).....                     | -5.92 | 1387.575 |

**Table S4.** Mutants with low free energy in the third round library.

| Name | Sequence(5'→3')                                                 | Dot-bracket information                    | ΔG (kcal/mol) | ZDOCK score |
|------|-----------------------------------------------------------------|--------------------------------------------|---------------|-------------|
| M3-1 | CCGCCCAAATCCCTAAGGGAAGACTGTAATG<br>ACATCAAACCAGACACATTACAGACGCA | ...(((.....))).....(((((((.....))))))..... | -9.44         | 1370.869    |
| M3-2 | CCGCCCAAATCCCTAAGCGAAGACTGGAATG<br>ACATCAAACCAGTCACACTACACACGCA | .(((.....)))..((((.....)))).....           | -9.42         | 1295        |
| M3-3 | CCGCCCAAATCCCTAAGCGAAGTCTGGAATG<br>ACATCAAACCAGACACACTACACACGCA | .(((.....)))..((((.....)))).....           | -9.42         | 1292.590    |
| M3-4 | CCGCCCAAATCCCTAAGGGAAGAGTGTAATG<br>ACATCAAACCAGACACATTACACACGCA | ...(((.....))).....(((((((.....))))))..... | -9.21         | 1385.598    |
| M3-5 | CCGCCCAAATCCCTAAGGGAAGACTGGAATG<br>ACATCAAACCAGTCACACTACACACGCA | ...(((.....)))..((((.....)))).....         | -9.19         | 1245.219    |

|       |                                                                 |                                          |       |          |
|-------|-----------------------------------------------------------------|------------------------------------------|-------|----------|
| M3-6  | CCGCCCAAATCCCTAAGTGAAGACTGGAATG<br>ACATCAAACCAGTCACACTACACACGCA | .....((((..((((..((....)..)))))).))..... | -9.16 | 1460.141 |
| M3-7  | CCGCCCAAATCCCTAAGAGAAGACTGGAATG<br>ACATCAAACCAGTCACTCTACACACGCA | .....((((..((((..((....)..)))))).))..... | -8.82 | 1214.207 |
| M3-8  | CCGCCCAAATCCCTAAGCGAAGTCTGTAATGA<br>CATCAAAACAGACACACTACACACGCA | .(((.....))..((((..((....)..))))).)      | -8.50 | 1369.698 |
| M3-9  | CCGCCCAAATCCCTAAGCGAAGTCTGTAATGA<br>CATCAAAACAGACACACTACACACGCA | .(((.....))..((((..((....)..))))).)      | -8.50 | 1243.932 |
| M3-10 | CCGCCCAAATCCCTAAGAGAAGACTGGATTG<br>ACATCAAACCAGTCACACTACACACGCA | .....((((..((((..((....)..)))))).))..... | -8.44 | 1270.633 |

**Table S5.** Mutants with low free energy in the fourth round library.

| Name | Sequence(5'→3')                                                 | Dot-bracket information                 | ΔG (kcal/mol) | ZDOCK score |
|------|-----------------------------------------------------------------|-----------------------------------------|---------------|-------------|
| M4-1 | CCGCCCAAATCCCTAAGGGCAGACTGTAATG<br>ACATCAAACCAGACACATTACAGACGCA | ..((((.....))..(((((((.....)))))))).    | -11.42        | 1274.997    |
| M4-2 | CCGCCCAAATCCCTAAGGGAAGACTGTAAT<br>GACGTCAAACCAGACACATTACAGACGCA | ...(((.....))..(((((((.....)))))))).    | -11.41        | 1293.240    |
| M4-3 | CCGCCCAAATCCCGAAGGGAAGACTGTAAT<br>GACATCAAACCAGACACATTACAGACGCA | .....((((.....))..(((((((.....)))))))). | -11.24        | 1321.559    |
| M4-4 | CCGCCCAAATCCCTAAGGGAAGTGTGTAATG<br>ACATCAAACCAGACACATTACACACGCA | ...(((.....))..(((((((.....)))))))).    | -11.35        | 1246.058    |

|       |                                                                 |                                           |        |          |
|-------|-----------------------------------------------------------------|-------------------------------------------|--------|----------|
| M4-5  | CCGCCCAAATCCCTAAGGGCAGAGTGTAAT<br>GACATCAAACCAGACACATTACACACGCA | ..(((.....))....(((((((.....))))))....    | -11.19 | 1235.186 |
| M4-6  | CCGCCCAAATCCCTAAGGGAAGAGTGTAAT<br>GACGTCAAACCAGACACATTACACACGCA | ...(((.....))....(((((((.....))))))....   | -11.18 | 1341.062 |
| M4-7  | CCGCCCAAATCCCTAAGGGAAGACTGTAAT<br>GACATCAAACCAGACACATTACAGTCGCA | ...(((.....))....(((((((.....))))))....   | -11.01 | 1313.665 |
| M4-8  | CCGCCCAAATCCCGAAGGGAAGAGTGTAAT<br>GACATCAAACCAGACACATTACACACGCA | .....(((.....))....(((((((.....)))))).... | -11.01 | 1296.120 |
| M4-9  | CCGCCCAAATCCCTAAGGGAAGAGTGTAAT<br>GACATCAAACCAGACACATTACACTCGCA | ...(((.....))....(((((((.....))))))....   | -11.01 | 1321.879 |
| M4-10 | CCGCCCAAATCCCTAAGTGAAGACTGGATT<br>GACATCAAACCAGTCACACTACACACGCA | .....((((.....))))....                    | -10.76 | 1354.180 |

**Table S6.** Mutants with low free energy in the fifth round library.

| Name | Sequence(5'→3')                                                 | Dot-bracket information                   | $\Delta G$ (kcal/mol) | ZDOCK score |
|------|-----------------------------------------------------------------|-------------------------------------------|-----------------------|-------------|
| M5-1 | CCGCCCAAATCCCTAAGTGAAGACTGGATTG<br>ACATCAATCCAGTCACACTACACACGCA | .....((((.....))))....                    | -14.13                | 1368.866    |
| M5-2 | CCGCCCAAATCCCGAAGGGAAGACTGTAATG<br>ACGTCAAACCAGACACATTACAGACGCA | .....(((.....))....(((((((.....)))))).... | -13.21                | 1202.775    |
| M5-3 | CCGCCCAAATCCCTAAGGGCAGAGTGTAATG<br>ACGTCAAACCAGACACATTACACACGCA | ..(((.....))....(((((((.....))))))....    | -13.16                | 1433.854    |

|       |                                                                 |                                          |        |          |
|-------|-----------------------------------------------------------------|------------------------------------------|--------|----------|
| M5-4  | CCGCCCAAATCCCTAAGGGACGAGTGTAATG<br>ACATCAAACCAGACACATTACACTCGCA | ...(((.....))).((((((((.....)))))))).    | -13.01 | 1261.402 |
| M5-5  | CCGCCCAAATCCCGAAGGGAAGAGTGTAATG<br>ACGTCAAACCAGACACATTACACACGCA | .....((((.....))).((((((((.....)))))))). | -12.98 | 1543.334 |
| M5-6  | CCGCCCAAATCCCGAAGGGAAGAGTGTAATG<br>ACATCAAACCAGACACATTACACTCGCA | .....((((.....))).((((((((.....)))))))). | -12.78 | 1320.181 |
| M5-7  | CCGCCCAAATCCCGAAGGGAAGTCTGTAATG<br>ACATCAAACCAGACACATTACAGACGCA | .....((((.....))).((((((((.....)))))))). | -12.78 | 1398.095 |
| M5-8  | CCGCCCAAATCCCGAAGGGAAGACTGTAATG<br>ACATCAAACCAGACACATTACAGTCGCA | .....((((.....))).((((((((.....)))))))). | -12.78 | 1460.231 |
| M5-9  | CCGCCCAAATCCCTAAGGGAAGAGTGTAATG<br>ACGTCAAACCAGACACATTACACTCGCA | ...(((.....))).((((((((.....)))))))).    | -12.75 | 1441.206 |
| M5-10 | CCGCCCAAATCCCGAAGGGATGACTGTAATG<br>ACATCAAACCAGACACATTACAGACGCA | .....((((.....))).((((((((.....)))))))). | -12.46 | 1305.417 |

**Table S7.** Mutants with low free energy in the sixth round library.

| Name | Sequence(5'→3')                                                 | Dot-bracket information                    | $\Delta G$ (kcal/mol) | ZDOCK score |
|------|-----------------------------------------------------------------|--------------------------------------------|-----------------------|-------------|
| M6-1 | CCGCCCAAATCCCTAAGGGCGGAGTGTAATG<br>ACGTCAAACCAGACACATTACACACGCA | ((((((((.....)))))).((((((((.....)))))))). | -16.29                | 1314.663    |
| M6-2 | CCGCCCAAATCCCGAAGGGAAGTGTGTAATG<br>ACGTCAAACCAGACACATTACACACGCA | .....((((.....))).((((((((.....)))))))).   | -15.09                | 1406.824    |

|       |                                                                 |                                                |        |          |
|-------|-----------------------------------------------------------------|------------------------------------------------|--------|----------|
| M6-3  | CCGCCCAAATCCCTAAGGGCAGAGTGTAATG<br>ACGTCAAACCAGACGCATTACACACGCA | ..((((.....)))).((((((((.....))))))))......    | -15.08 | 1343.275 |
| M6-4  | CCGCCCAAATCCCTAAGGGACGAGTGTAATG<br>ACGTCAAACCAGACACATTACACTCGCA | ...((((.....)))).((((((((.....))))))))....     | -14.98 | 1380.029 |
| M5-5  | CTGCCCAAATCCCTAAGGGCAGAGTGTAATG<br>ACGTCAAACCAGACACATTACACACGCA | ((((((.....)))))).((((((((.....))))))))......  | -14.97 | 1241.493 |
| M6-6  | CCGCCCAAATCCCGAAGGGAAGAGTGTAATG<br>ACGTCAAACCAGACGCATTACACACGCA | .....((((.....)))).((((((((.....))))))))...... | -14.90 | 1394.455 |
| M6-7  | CCGCCCAAATCCCTAAGGGAAGAGTGTAATG<br>ACGTCAAACCAGACGCATTACACTCGCA | ...((((.....)))).((((((((.....))))))))....     | -14.90 | 1354.663 |
| M6-8  | CCGCCCAAATCCCGAAGGGAAGAGTGTAATG<br>ACGTCAAACCAGACACATTACACTCGCA | .....((((.....)))).((((((((.....))))))))....   | -14.75 | 1307.655 |
| M6-9  | CCGCCCAAATCCCTAAGGGCAGTGTGTAATGA<br>CGTCAAACCAGACACATTACACACGCA | ..((((.....)))).((((((((.....))))))))....      | -14.70 | 1381.942 |
| M6-10 | CCGCCCAAATCCCGAAGGGACGACTGTAATG<br>ACATCAAACCAGACACATTACAGTCGCA | .....((((.....)))).((((((((.....))))))))....   | -14.57 | 1331.607 |

---

**Table S8.** The binding residues of B1-4 and M5-5 based on the Mfold prediction interacted with IFN- $\gamma$  through hydrogen bonding.

| Sequence | Binding residues                                                                                                                                                                                                                                                             |
|----------|------------------------------------------------------------------------------------------------------------------------------------------------------------------------------------------------------------------------------------------------------------------------------|
| B 1-4    | <sup>I</sup> Tyr14-C54, <sup>II</sup> Asn25-A34, <sup>I</sup> Lys58-A32, <sup>I</sup> Lys61-G31, <sup>I</sup> Lys94-T35, <sup>I</sup> Asn97-C33, <sup>I</sup> Tyr98-A34, <sup>I</sup> Ser99-C33, <sup>II</sup> Thr101-C54, <sup>I</sup> Asp102-A34, <sup>II</sup> Gln106-C54 |
| M 5-5    | <sup>I</sup> Tyr14-C12, <sup>I</sup> Tyr14-A20, <sup>I</sup> Asn59-A9, <sup>II</sup> Asn59-C2, <sup>II</sup> Asn59-G3, <sup>I</sup> Asp63-C11, <sup>I</sup> Ser65-G14, <sup>II</sup> Thr101-A9, <sup>I</sup> Gln106-C2, <sup>II</sup> Gln106-T10                             |

I, II representative the two monomers of IFN- $\gamma$ , respectively.

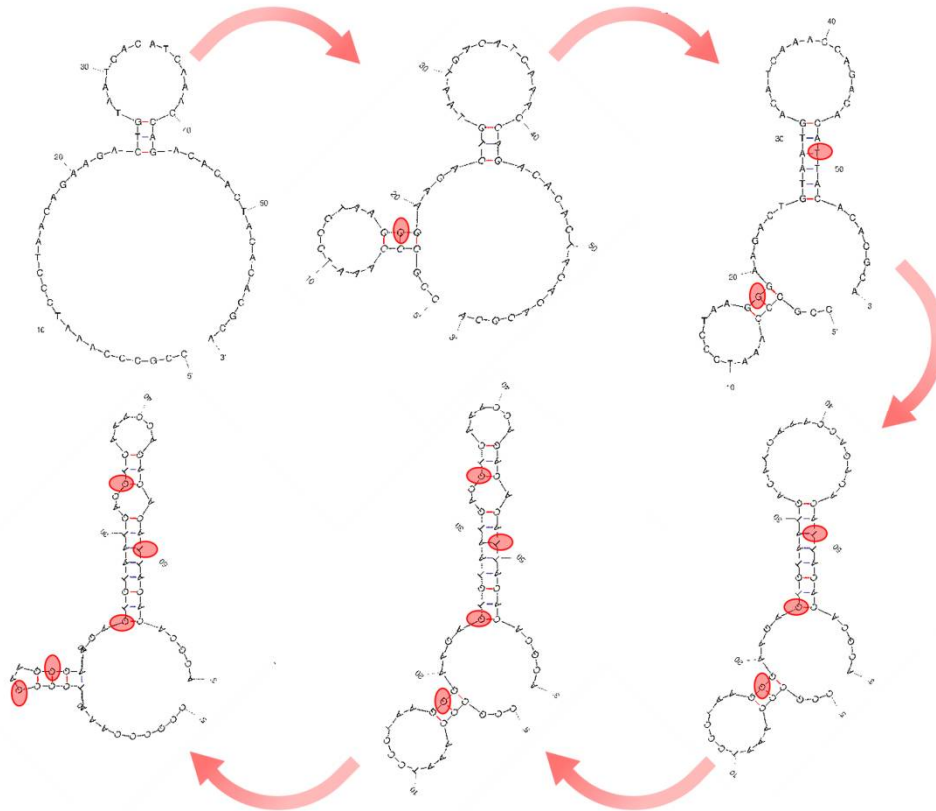

**Figure S1.** The phylogeny of the M5-5 aptamer predicted by the Mfold. The mutation sites are shaded in red.

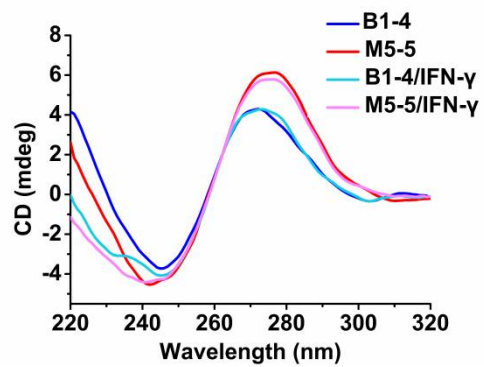

**Figure S2.** Circular dichroism (CD) analysis of B1-4 and M5-5 with or without IFN- $\gamma$ .

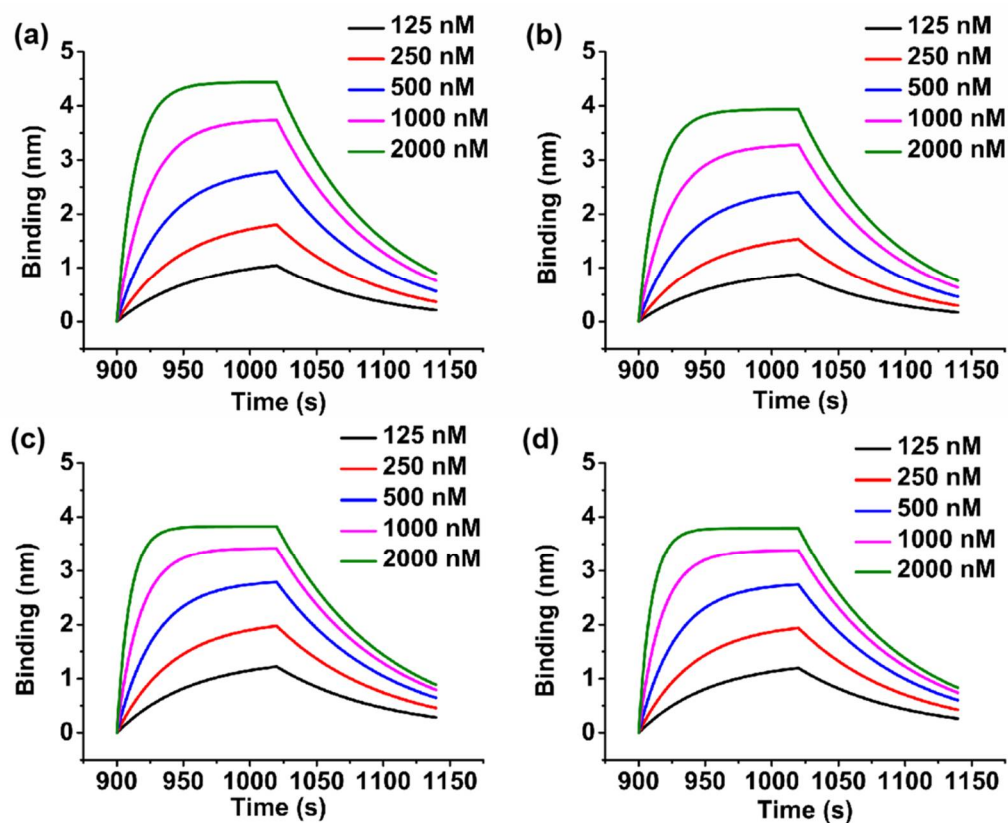

**Figure S3.** BLI characterization of the affinity of (a) M1-8, (b) M2-6, (c) M3-6 and (d) M4-10.

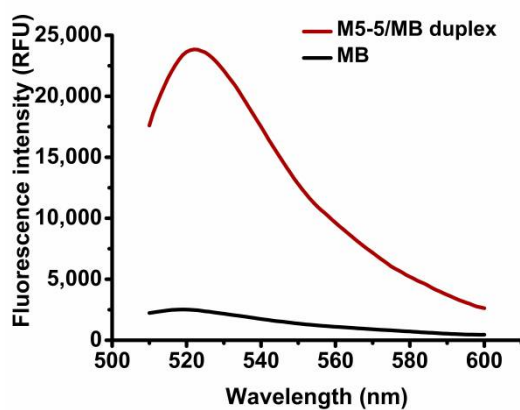

**Figure S4.** Fluorescence emission spectra of the M5-5/MB duplex and MB.
